# Supplementary material for: Effect of Intermittent Theta Burst Stimulation on the Neural Processing of Emotional Stimuli in Healthy Volunteers
Source: MDPI journal article supplement (doi:10.3390/jcm10112449), 2021-06-01
Supplement: s1 [file s1]

**Supplementary Table S1.** Norris' Visual Analogue Scales before and after iTBS.

|                 | Active group     |                  | Placebo group    |                  | Time effect |              | Group effect |              | Group x time interaction |               |                  |
|-----------------|------------------|------------------|------------------|------------------|-------------|--------------|--------------|--------------|--------------------------|---------------|------------------|
|                 | Before           | After            | Before           | After            | F[1:28]     | p            | F[1:28]      | p            | F[1:28]                  | p             | Partial $\eta^2$ |
| Drowsiness      | 4.034<br>(1.982) | 2.990<br>(1.969) | 3.149<br>(2.268) | 2.170<br>(2.231) | 4.572       | <b>0.041</b> | 1.915        | 0.177        | 0.004                    | 0.952         | 0.000            |
| Daydreaming     | 3.314<br>(1.324) | 1.780<br>(1.402) | 2.092<br>(1.822) | 2.090<br>(2.482) | 3.514       | 0.071        | 0.721        | 0.403        | 3.511                    | 0.071         | 0.111            |
| Energy          | 6.626<br>(1.453) | 7.602<br>(1.507) | 7.916<br>(1.691) | 8.664<br>(1.662) | 6.708       | <b>0.015</b> | 6.093        | <b>0.020</b> | 0.117                    | 0.735         | 0.004            |
| Clarity of mind | 8.020<br>(1.308) | 8.719<br>(1.157) | 8.630<br>(1.347) | 9.122<br>(1.123) | 14.587      | <b>0.001</b> | 1.416        | 0.244        | 0.441                    | 0.512         | 0.016            |
| Clumsiness      | 3.180<br>(1.951) | 2.010<br>(1.157) | 2.110<br>(1.942) | 1.010<br>(1.109) | 14.89       | <b>0.001</b> | 3.478        | 0.073        | 0.020                    | 0.889         | 0.001            |
| Vivacity        | 7.368<br>(1.174) | 8.336<br>(1.280) | 8.278<br>(1.628) | 8.754<br>(1.334) | 12.384      | <b>0.002</b> | 2.095        | 0.159        | 1.437                    | 0.241         | 0.049            |
| Weakness        | 2.980<br>(1.308) | 2.180<br>(1.684) | 2.590<br>(2.488) | 1.160<br>(1.379) | 6.920       | <b>0.014</b> | 1.973        | 0.171        | 0.552                    | 0.464         | 0.019            |
| Boredom         | 2.280<br>(1.565) | 1.332<br>(1.329) | 1.470<br>(1.615) | 1.539<br>(1.832) | 3.963       | 0.056        | 0.306        | 0.585        | 5.217                    | <b>0.030*</b> | 0.157            |
| Competency      | 8.097<br>(1.402) | 8.712<br>(0.989) | 8.940<br>(1.151) | 9.194<br>(1.002) | 8.998       | <b>0.006</b> | 2.851        | 0.102        | 1.542                    | 0.225         | 0.052            |
| Sadness         | 2.530<br>(1.913) | 1.860<br>(1.081) | 1.460<br>(1.320) | 1.470<br>(1.633) | 1.504       | 0.230        | 2.259        | 0.144        | 1.545                    | 0.224         | 0.052            |
| Peace of mind   | 7.625<br>(1.781) | 8.662<br>(0.791) | 8.791<br>(1.383) | 9.198<br>(1.006) | 6.853       | <b>0.014</b> | 4.933        | <b>0.035</b> | 1.303                    | 0.263         | 0.044            |
| Dissatisfaction | 2.490<br>(1.420) | 1.650<br>(1.150) | 2.080<br>(2.386) | 0.890<br>(0.992) | 7.644       | <b>0.010</b> | 1.648        | 0.210        | 0.227                    | 0.638         | 0.008            |
| Sociability     | 7.864<br>(1.604) | 8.382<br>(1.115) | 8.973<br>(1.018) | 9.416<br>(0.799) | 6.136       | <b>0.020</b> | 8.139        | <b>0.008</b> | 0.037                    | 0.849         | 0.001            |
| Restlessness    | 3.852<br>(1.588) | 2.470<br>(1.878) | 2.728<br>(1.937) | 2.000<br>(2.171) | 6.703       | <b>0.015</b> | 1.958        | 0.173        | 0.641                    | 0.430         | 0.022            |
| Relaxation      | 6.950<br>(1.668) | 8.260<br>(1.200) | 8.330<br>(1.189) | 9.090<br>(1.093) | 16.804      | <b>0.001</b> | 7.647        | <b>0.010</b> | 1.172                    | 0.288         | 0.040            |
| Quality of life | 7.720<br>(1.703) | 8.390<br>(1.350) | 8.830<br>(1.564) | 8.810<br>(1.668) | 3.255       | 0.082        | 1.940        | 0.175        | 3.645                    | 0.067         | 0.115            |
| Coping          | 8.110<br>(1.406) | 8.590<br>(1.109) | 8.890<br>(1.490) | 8.920<br>(1.697) | 2.976       | 0.096        | 1.188        | 0.285        | 2.337                    | 0.138         | 0.077            |

**Notes:** Mean (SD) are reported for each group before and after iTBS. Statistic and p values are reported for different factors of the repeated measures analysis of variance. Size effects (partial  $\eta^2$ ) are specified for group x time interaction effect. Values in bold indicate  $p \leq 0.05$ . \* This result was no longer significant after Bonferroni correction for multiple comparisons.
